# Supplementary material for: Resolving Discrepancies in Idylla BRAF Mutational Assay Results Using Targeted Next-Generation Sequencing
Source: MDPI journal article supplement (doi:10.3390/genes15050527), 2024-04-23

## **SUPPLEMENTAL MATERIAL**

### **Resolving Discrepancies in Idylla *BRAF* Mutational Assay Results Using Targeted Next-Generation Sequencing**

Giby V. George<sup>1</sup>, Huijie Liu<sup>1</sup>, Audrey N. Jajosky<sup>1</sup>, Zoltán N. Oltvai<sup>1</sup>

<sup>1</sup>Department of Pathology and Laboratory Medicine, University of Rochester, Rochester, NY  
14627, USA

## SUPPLEMENTAL TABLES

**Supplemental Table S1 Nucleic Acid Variant Concordance**

| Sample ID | Result (Idylla)                                                                          | $\Delta Cq$ | SPC1 (Cq) | SPC2 (Cq) | SPC3 (Cq) | WT (Cq) | Reference Results                      | Ref. Meth.    | Sample Type     |
|-----------|------------------------------------------------------------------------------------------|-------------|-----------|-----------|-----------|---------|----------------------------------------|---------------|-----------------|
| 1         | BRAF V600E/V600E2/V600D, c.1799T>A/c.1799_1800TG>AA /c.1799_1800TG>AT/ c.1799_1800TG> AC | 1.64        | 37.5      | 38.2      | 39.6      | 38.9    | BRAF c.1799T>A, p.Val600Glu            | Send-out NGS  | FFPE Lung       |
| 2         | BRAF V600E/V600E2/V600D, c.1799T>A/c.1799_1800TG>AA /c.1799_1800TG>AT/ c.1799_1800TG> AC | 0.74        | 34.6      | 34.9      | 34.3      | 35.2    | BRAF c.1799T>A, p.Val600Glu            | Send-out NGS  | FFPE Lung       |
| 3         | BRAF V600E/V600E2/V600D, c.1799T>A/c.1799_1800TG>AA /c.1799_1800TG>AT/ c.1799_1800TG> AC | 3.67        | 32.1      | 32.5      | 32.9      | 31.7    | BRAF c.1799T>A, p.Val600Glu, VAF 8.72  | NGS           | FFPE Lung       |
| 4         | BRAF V600E/V600E2/V600D, c.1799T>A/c.1799_1800TG>AA /c.1799_1800TG>AT/ c.1799_1800TG> AC | 3.01        | 35.6      | 35.3      | 36.8      | 35.9    | BRAF c.1799T>A, p.Val600Glu            | In house BRAF | FFPE Colon      |
| 5         | BRAF V600E/V600E2/V600D, c.1799T>A/c.1799_1800TG>AA /c.1799_1800TG>AT/ c.1799_1800TG> AC | 3.10        | 33.4      | 33        | 34.9      | 33.6    | BRAF c.1799T>A, p.Val600Glu            | In house BRAF | FFPE Colon      |
| 6         | BRAF V600E/V600E2/V600D, c.1799T>A/c.1799_1800TG>AA /c.1799_1800TG>AT/ c.1799_1800TG> AC | 4.65        | 36.6      | 36.7      | 37.8      | 37.3    | BRAF c.1799T>A, p.Val600Glu            | Send-out NGS  | FFPE Pleura     |
| 7*        | BRAF V600E/V600E2/V600D, c.1799T>A/c.1799_1800TG>AA /c.1799_1800TG>AT/ c.1799_1800TG> AC | 2.86        | 32.9      | 32.9      | 33.9      | 32.9    | BRAF c.1799T>A, p.Val600Glu, VAF 11.94 | NGS           | FFPE Lung       |
| 8         | BRAF V600E/V600E2/V600D, c.1799T>A/c.1799_1800TG>AA /c.1799_1800TG>AT/ c.1799_1800TG> AC | 2.23        | 32.6      | 30.9      | 30.9      | 32.5    | BRAF c.1799T>A, p.Val600Glu            | In house BRAF | FFPE Lung       |
| 9         | BRAF V600E/V600E2/V600D, c.1799T>A/c.1799_1800TG>AA /c.1799_1800TG>AT/ c.1799_1800TG> AC | 0.65        | 34        | 34.4      | 36.6      | 36.2    | BRAF c.1799T>A, p.Val600Glu            | NGS           | FFPE Lymph node |
| 10        | BRAF V600E/V600E2/V600D, c.1799T>A/c.1799_1800TG>AA /c.1799_1800TG>AT/ c.1799_1800TG> AC | 1.41        | 29.9      | 29.7      | 31.4      | 30.3    | BRAF c.1799T>A, p.Val600Glu            | In house BRAF | FFPE Colon      |

|    |                                                                                                   |      |      |      |      |      |                                   |                     |                                      |
|----|---------------------------------------------------------------------------------------------------|------|------|------|------|------|-----------------------------------|---------------------|--------------------------------------|
| 11 | BRAF V600E/V600E2/V600D,<br>c.1799T>A/c.1799_1800TG>AA/<br>c.1799_1800TG>AT/<br>c.1799_1800TG> AC | 1.96 | 31.1 | 31   | 32.8 | 31.8 | BRAF<br>c.1799T>A,<br>p.Val600Glu | In<br>house<br>BRAF | FFPE<br>Colon                        |
| 12 | BRAF V600E/V600E2/V600D,<br>c.1799T>A/c.1799_1800TG>AA/<br>c.1799_1800TG>AT/<br>c.1799_1800TG> AC | 3.35 | 35.5 | 34.9 | 35.9 | 36   | BRAF<br>c.1799T>A,<br>p.Val600Glu | In<br>house<br>BRAF | FFPE<br>Skin                         |
| 13 | No Mutation detected in BRAF<br>Codon 600                                                         |      | 32.9 | 33.6 | 33.9 | 32.1 | No BRAF<br>Mutation<br>detected   | Send-<br>out<br>NGS | FFPE<br>Pleural<br>fluid             |
| 14 | No Mutation detected in BRAF<br>Codon 600                                                         |      | 31.5 | 31.5 | 32.7 | 31.4 | No BRAF<br>Mutation<br>detected   | Send-<br>out<br>NGS | FFPE<br>Lymph<br>node                |
| 15 | No Mutation detected in BRAF<br>Codon 600                                                         |      | 30.1 | 30.2 | 30.9 | 29.8 | No BRAF<br>Mutation<br>detected   | Send-<br>out<br>NGS | FFPE<br>Lung                         |
| 16 | No Mutation detected in BRAF<br>Codon 600                                                         |      | 31   | 31.4 | 30.6 | 30.3 | No BRAF<br>Mutation<br>detected   | Send-<br>out<br>NGS | FFPE<br>Brain                        |
| 17 | No Mutation detected in BRAF<br>Codon 600                                                         |      | 28.4 | 27.5 | 29.9 | 27   | No BRAF<br>Mutation<br>detected   | Send-<br>out<br>NGS | FFPE<br>Metasta<br>tic lung<br>tumor |
| 18 | No Mutation detected in BRAF<br>Codon 600                                                         |      | 29.8 | 29.6 | 29.6 | 29.6 | No BRAF<br>Mutation<br>detected   | Send-<br>out<br>NGS | FFPE<br>Lung                         |

**Supplemental Table S2 Tissue Variant Concordance**

| Sample<br>ID | Result (Idylla)                                                                                   | $\Delta Cq$ | SPC1<br>(Cq) | SPC2<br>(Cq) | SPC3<br>(Cq) | WT<br>(Cq) | Reference<br>Results                           | Ref.<br>Meth.       | Sample<br>Type |
|--------------|---------------------------------------------------------------------------------------------------|-------------|--------------|--------------|--------------|------------|------------------------------------------------|---------------------|----------------|
| 1            | BRAF V600E/V600E2/V600D,<br>c.1799T>A/c.1799_1800TG>AA/<br>c.1799_1800TG>AT/<br>c.1799_1800TG> AC | 1.64        | 37.5         | 38.2         | 39.6         | 38.9       | BRAF<br>c.1799T>A,<br>p.Val600Glu              | Send-<br>out<br>NGS | FFPE<br>Lung   |
| 2            | BRAF V600E/V600E2/V600D,<br>c.1799T>A/c.1799_1800TG>AA/<br>c.1799_1800TG>AT/<br>c.1799_1800TG> AC | 0.74        | 34.6         | 34.9         | 34.3         | 35.2       | BRAF<br>c.1799T>A,<br>p.Val600Glu              | Send-<br>out<br>NGS | FFPE<br>Lung   |
| 3            | BRAF V600E/V600E2/V600D,<br>c.1799T>A/c.1799_1800TG>AA/<br>c.1799_1800TG>AT/<br>c.1799_1800TG> AC | 3.67        | 32.1         | 32.5         | 32.9         | 31.7       | BRAF<br>c.1799T>A,<br>p.Val600Glu,<br>VAF 8.72 | NGS                 | FFPE<br>Lung   |

|    |                                                                                                   |      |      |      |      |      |                                                 |                     |                          |
|----|---------------------------------------------------------------------------------------------------|------|------|------|------|------|-------------------------------------------------|---------------------|--------------------------|
| 4  | BRAF V600E/V600E2/V600D,<br>c.1799T>A/c.1799_1800TG>AA/<br>c.1799_1800TG>AT/<br>c.1799_1800TG> AC | 3.01 | 35.6 | 35.3 | 36.8 | 35.9 | BRAF<br>c.1799T>A,<br>p.Val600Glu               | In<br>house<br>BRAF | FFPE<br>Colon            |
| 5  | BRAF V600E/V600E2/V600D,<br>c.1799T>A/c.1799_1800TG>AA/<br>c.1799_1800TG>AT/<br>c.1799_1800TG> AC | 3.10 | 33.4 | 33   | 34.9 | 33.6 | BRAF<br>c.1799T>A,<br>p.Val600Glu               | In<br>house<br>BRAF | FFPE<br>Colon            |
| 6  | BRAF V600E/V600E2/V600D,<br>c.1799T>A/c.1799_1800TG>AA/<br>c.1799_1800TG>AT/<br>c.1799_1800TG> AC | 4.65 | 36.6 | 36.7 | 37.8 | 37.3 | BRAF<br>c.1799T>A,<br>p.Val600Glu               | Send-<br>out<br>NGS | FFPE<br>Pleura           |
| 7* | BRAF V600E/V600E2/V600D,<br>c.1799T>A/c.1799_1800TG>AA/<br>c.1799_1800TG>AT/<br>c.1799_1800TG> AC | 2.86 | 32.9 | 32.9 | 33.9 | 32.9 | BRAF<br>c.1799T>A,<br>p.Val600Glu,<br>VAF 11.94 | NGS                 | FFPE<br>Lung             |
| 8  | BRAF V600E/V600E2/V600D,<br>c.1799T>A/c.1799_1800TG>AA/<br>c.1799_1800TG>AT/<br>c.1799_1800TG> AC | 2.23 | 32.6 | 30.9 | 30.9 | 32.5 | BRAF<br>c.1799T>A,<br>p.Val600Glu               | In<br>house<br>BRAF | FFPE<br>Lung             |
| 9  | BRAF V600E/V600E2/V600D,<br>c.1799T>A/c.1799_1800TG>AA/<br>c.1799_1800TG>AT/<br>c.1799_1800TG> AC | 0.65 | 34   | 34.4 | 36.6 | 36.2 | BRAF<br>c.1799T>A,<br>p.Val600Glu               | NGS                 | FFPE<br>Lymph<br>node    |
| 10 | BRAF V600E/V600E2/V600D,<br>c.1799T>A/c.1799_1800TG>AA/<br>c.1799_1800TG>AT/<br>c.1799_1800TG> AC | 1.41 | 29.9 | 29.7 | 31.4 | 30.3 | BRAF<br>c.1799T>A,<br>p.Val600Glu               | In<br>house<br>BRAF | FFPE<br>Colon            |
| 11 | BRAF V600E/V600E2/V600D,<br>c.1799T>A/c.1799_1800TG>AA/<br>c.1799_1800TG>AT/<br>c.1799_1800TG> AC | 1.96 | 31.1 | 31   | 32.8 | 31.8 | BRAF<br>c.1799T>A,<br>p.Val600Glu               | In<br>house<br>BRAF | FFPE<br>Colon            |
| 12 | BRAF V600E/V600E2/V600D,<br>c.1799T>A/c.1799_1800TG>AA/<br>c.1799_1800TG>AT/<br>c.1799_1800TG> AC | 3.35 | 35.5 | 34.9 | 35.9 | 36   | BRAF<br>c.1799T>A,<br>p.Val600Glu               | In<br>house<br>BRAF | FFPE<br>Skin             |
| 13 | No Mutation detected in BRAF<br>Codon 600                                                         |      | 32.9 | 33.6 | 33.9 | 32.1 | No BRAF<br>Mutation<br>detected                 | Send-<br>out<br>NGS | FFPE<br>Pleural<br>fluid |
| 14 | No Mutation detected in BRAF<br>Codon 600                                                         |      | 31.5 | 31.5 | 32.7 | 31.4 | No BRAF<br>Mutation<br>detected                 | Send-<br>out<br>NGS | FFPE<br>Lymph<br>node    |
| 15 | No Mutation detected in BRAF<br>Codon 600                                                         |      | 30.1 | 30.2 | 30.9 | 29.8 | No BRAF<br>Mutation<br>detected                 | Send-<br>out<br>NGS | FFPE<br>Lung             |
| 16 | No Mutation detected in BRAF<br>Codon 600                                                         |      | 31   | 31.4 | 30.6 | 30.3 | No BRAF<br>Mutation<br>detected                 | Send-<br>out<br>NGS | FFPE<br>Brain            |

|    |                                           |  |      |      |      |      |                                 |                     |                                      |
|----|-------------------------------------------|--|------|------|------|------|---------------------------------|---------------------|--------------------------------------|
| 17 | No Mutation detected in BRAF<br>Codon 600 |  | 28.4 | 27.5 | 29.9 | 27   | No BRAF<br>Mutation<br>detected | Send-<br>out<br>NGS | FFPE<br>Metastat<br>ic lung<br>tumor |
| 18 | No Mutation detected in BRAF<br>Codon 600 |  | 29.8 | 29.6 | 29.6 | 29.6 | No BRAF<br>Mutation<br>detected | Send-<br>out<br>NGS | FFPE<br>Lung                         |

**Supplemental Table S3 Limit of Detection**

|                                                         | Dilution | Expected VAF<br>(%) | SPC1<br>(ΔCq) | SPC2<br>(ΔCq) | SPC3<br>(ΔCq) | WT<br>(ΔCq) | ΔCq  | Idylla Result |
|---------------------------------------------------------|----------|---------------------|---------------|---------------|---------------|-------------|------|---------------|
| HD705 (BRAF<br>c.1799T>A,<br>p.Val600Glu)               | N/A      | 5                   | 33.7          | 33.7          | 35.6          | 34.4        | 4.3  | Detected      |
|                                                         | 1:2      | 2.5                 | 34.4          | 34.1          | 35.7          | 35.1        | 5.0  | Detected      |
|                                                         | 1:4      | 1.25                | 34.2          | 34.5          | 36.2          | 34.8        | 7.6  | Detected      |
|                                                         | 1:8      | 0.625               | 34.4          | 34.5          | 34.3          | 34.9        |      | Not Detected  |
| HD123 (BRAF<br>c.1798_1799G>TdelinsAA<br>, p.Val600Lys) | N/A      | 5                   | 34.3          | 34.5          | 35.1          | 34.8        | 7.6  | Detected      |
|                                                         | 1:2      | 2.5                 | 33.8          | 34.0          | 35.6          | 34.6        | 10.3 | Detected      |
|                                                         | 1:4      | 1.25                | 34.1          | 34.6          | 34.2          | 34.5        | 9.1  | Detected      |
|                                                         | 1:8      | 0.625               | 34.4          | 34.5          | 34.3          | 34.9        |      | Not Detected  |

**Supplemental Table S4.1 Input Limitation for 5% VAF**

| HD705 (BRAF c.1799T>A, p.Val600Glu, VAF 5%) |              |              |              |            |     |                  | HD123 (BRAF c.1798_1799G>TdelinsAA, p.Val600Lys, VAF 5%) |              |              |              |            |     |                  |
|---------------------------------------------|--------------|--------------|--------------|------------|-----|------------------|----------------------------------------------------------|--------------|--------------|--------------|------------|-----|------------------|
| Input (ng)                                  | SPC1<br>(Cq) | SPC2<br>(Cq) | SPC3<br>(Cq) | WT<br>(Cq) | ΔCq | Idylla<br>Result | Input (ng)                                               | SPC1<br>(Cq) | SPC2<br>(Cq) | SPC3<br>(Cq) | WT<br>(Cq) | ΔCq | Idylla<br>Result |
| 50                                          | 33.7         | 33.7         | 35.6         | 34.4       | 4.3 | Detected         | 50                                                       | 34.3         | 34.5         | 35.1         | 34.8       | 7.6 | Detected         |
| 25                                          | 35.6         | 36.1         | 37.0         | 35.9       | 5.2 | Detected         | 25                                                       | 34.8         | 35.5         | 35.6         | 35.6       | 7.3 | Detected         |
| 12.5                                        | 36.6         | 37.1         | 36.7         | 37.8       | 5.6 | Detected         | 12.5                                                     | 35.5         | 36.2         | 36.7         | 36.4       | 6.9 | Detected         |

**Supplemental Table S4.2 Input Limitation for 1.25% VAF**

| HD705 (BRAF c.1799T>A, p.Val600Glu, VAF 1.25%) |           |           |           |         |             |               | HD123 (BRAF c.1798_1799G>TdelinsAA, p.Val600Lys, VAF 1.25%) |           |           |           |         |             |               |
|------------------------------------------------|-----------|-----------|-----------|---------|-------------|---------------|-------------------------------------------------------------|-----------|-----------|-----------|---------|-------------|---------------|
| Input (ng)                                     | SPC1 (Cq) | SPC2 (Cq) | SPC3 (Cq) | WT (Cq) | $\Delta$ Cq | Idylla Result | Input (ng)                                                  | SPC1 (Cq) | SPC2 (Cq) | SPC3 (Cq) | WT (Cq) | $\Delta$ Cq | Idylla Result |
| 100                                            | 33.7      | 33.4      | 34.5      | 34.3    | 5.6         | Detected      | 100                                                         | 33.2      | 34.5      | 34.6      | 33.8    | 11.1        | Detected      |
| 50                                             | 34.2      | 34.5      | 36.2      | 34.2    | 7.6         | Detected      | 50                                                          | 34.1      | 34.6      | 34.2      | 34.5    | 9.1         | Detected      |
| 25                                             | 35.9      | 36.1      | 36.8      | 36.8    | 5.1         | Detected      | 25                                                          | 35.6      | 37.3      | 36.2      | 36.6    |             | Insufficient  |

**Supplemental Table S5 Reproducibility**

| Specimen No. | Variant                                                                               | $\Delta Cq$ | SPC1 (Cq) | SPC2 (Cq) | SPC1 (Cq) | WT (Cq) |
|--------------|---------------------------------------------------------------------------------------|-------------|-----------|-----------|-----------|---------|
| 3-1          | BRAF V600E/V600E2/V600D, c.1799T>A/c.1799_1800TG>AA/c.1799_1800TG>AT/c.1799_1800TG>AC | 3.7         | 32.1      | 32.5      | 32.9      | 31.7    |
| 3-2          | BRAF V600E/V600E2/V600D, c.1799T>A/c.1799_1800TG>AA/c.1799_1800TG>AT/c.1799_1800TG>AC | 4.1         | 30.9      | 31.6      | 31        | 31.2    |
| 3-3          | BRAF V600E/V600E2/V600D, c.1799T>A/c.1799_1800TG>AA/c.1799_1800TG>AT/c.1799_1800TG>AC | 3.3         | 31        | 30.4      | 32.4      | 31      |
| 7-1          | BRAF V600E/V600E2/V600D, c.1799T>A/c.1799_1800TG>AA/c.1799_1800TG>AT/c.1799_1800TG>AC | 2.9         | 32.9      | 32.9      | 33.9      | 32.9    |
| 7-2          | BRAF V600E/V600E2/V600D, c.1799T>A/c.1799_1800TG>AA/c.1799_1800TG>AT/c.1799_1800TG>AC | 3.2         | 32.9      | 33.3      | 34.8      | 33.2    |
| 7-3          | BRAF V600E/V600E2/V600D, c.1799T>A/c.1799_1800TG>AA/c.1799_1800TG>AT/c.1799_1800TG>AC | 2.7         | 33.6      | 33.2      | 34.9      | 33.1    |
| 5-1          | BRAF V600E/V600E2/V600D, c.1799T>A/c.1799_1800TG>AA/c.1799_1800TG>AT/c.1799_1800TG>AC | 3.1         | 33.4      | 33        | 34.9      | 33.6    |
| 5-2          | BRAF V600E/V600E2/V600D, c.1799T>A/c.1799_1800TG>AA/c.1799_1800TG>AT/c.1799_1800TG>AC | 4.1         | 33        | 32.5      | 34.4      | 33      |
| 5-3          | BRAF V600E/V600E2/V600D, c.1799T>A/c.1799_1800TG>AA/c.1799_1800TG>AT/c.1799_1800TG>AC | 3.6         | 33.6      | 32.7      | 32.9      | 34      |
| 14-1         | No BRAF mutation detected                                                             |             | 31.5      | 31.5      | 32.7      | 31.4    |
| 14-2         | No BRAF mutation detected                                                             |             | 30.8      | 32.3      | 30.5      | 30.9    |
| 14-3         | No BRAF mutation detected                                                             |             | 31.4      | 31.2      | 33        | 31.7    |
| 15-1         | No BRAF mutation detected                                                             |             | 30.1      | 30.2      | 30.9      | 29.8    |
| 15-2         | No BRAF mutation detected                                                             |             | 30.6      | 30.5      | 30.3      | 30.2    |
| 15-3         | No BRAF mutation detected                                                             |             | 30.7      | 30.6      | 31.1      | 30.5    |
| 18-1         | No BRAF mutation detected                                                             |             | 29.8      | 29.6      | 29.6      | 29.6    |
| 18-2         | No BRAF mutation detected                                                             |             | 29.9      | 30.7      | 29.6      | 29.8    |
| 18-3         | No BRAF mutation detected                                                             |             | 30.3      | 29.8      | 29.7      | 29.7    |

SUPPLEMENTAL FIGURES

Idylla amplification profiles of NGS-tested specimens with non-V600 BRAF variants that were ±5 amino acids of the BRAF V600 codon

Figure S1. BRAF Gly596Val  
NGS result: BRAF c.1787G>T, p.Gly596Val (VAF: 6%),  
HRAS c.34G>A, p.Gly12Ser (VAF: 12%)  
Idylla software interpretation: NO MUTATION DETECTED IN BRAF CODON 600

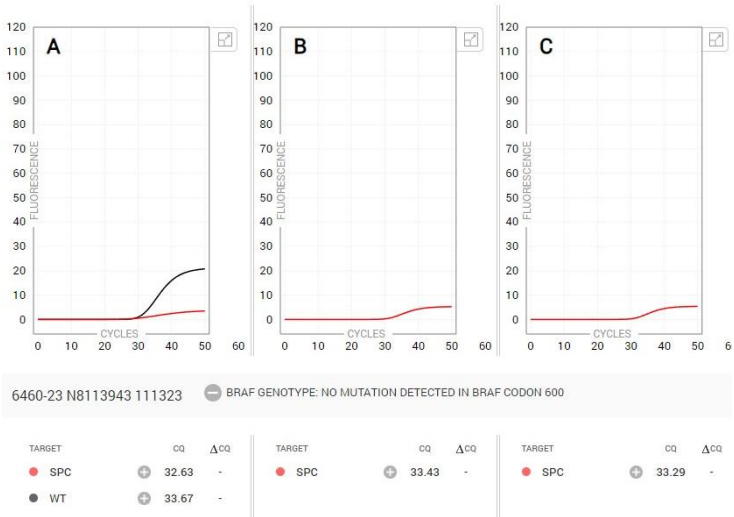

Figure S2. BRAF Leu597Arg  
NGS result: BRAF c.1790T>G, p.L597R (VAF: 21%)  
Idylla software interpretation: NO MUTATION DETECTED IN BRAF CODON 600

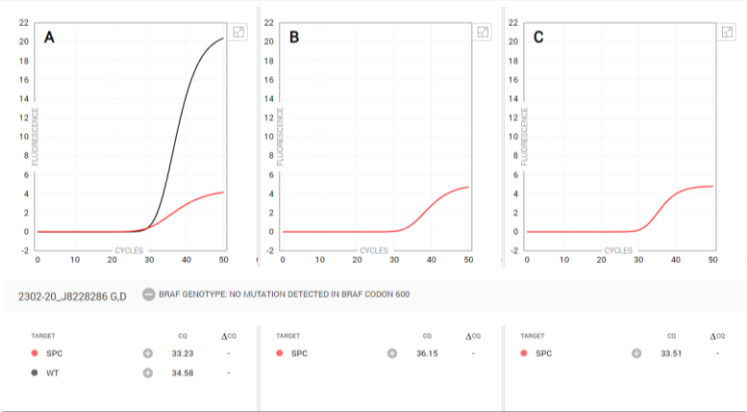



Figure S3. *BRAF* Leu597Val  
 NGS result: *BRAF* c.1789C>G, p.L597V (VAF: 42%)  
 Idylla software interp.: NO MUTATION DETECTED IN *BRAF* CODON 600

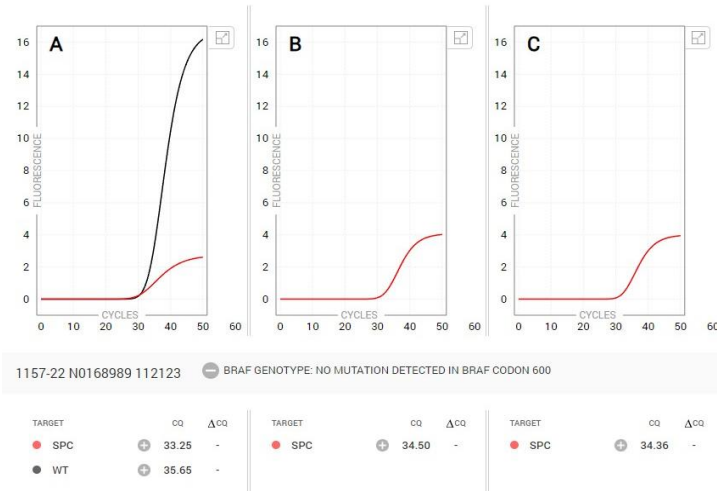

Figure S4. *BRAF* Leu597Gln  
 NGS result: *BRAF* c.1790T>A, p.L597Q (VAF: 13%);  
*KRAS* c.38G>A, p.G13D (VAF: 14%),  
*ROS1* c.5827G>A, E1943K (VAF: 11%)  
 Idylla software interpretation: NO MUTATION DETECTED IN *BRAF* CODON 600

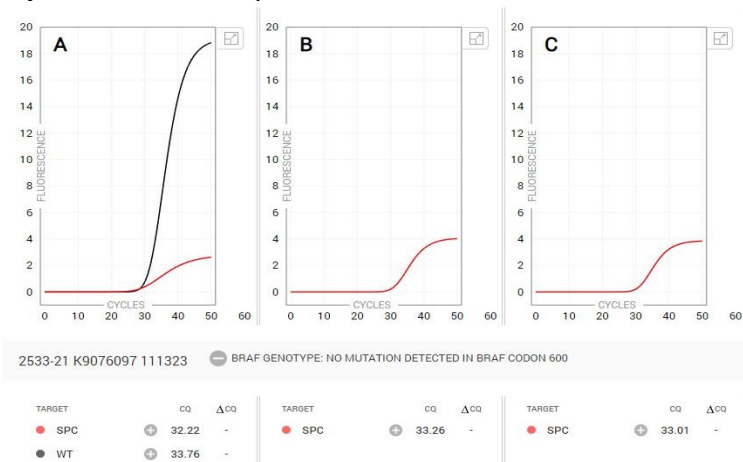

Figure S5. *BRAF* Ala598\_Thr599insVal  
 NGS result: *BRAF* c.1794\_1795insGTT, p.A598\_T599insV  
 Idylla software interpretation: NO MUTATION DETECTED IN *BRAF* CODON 600

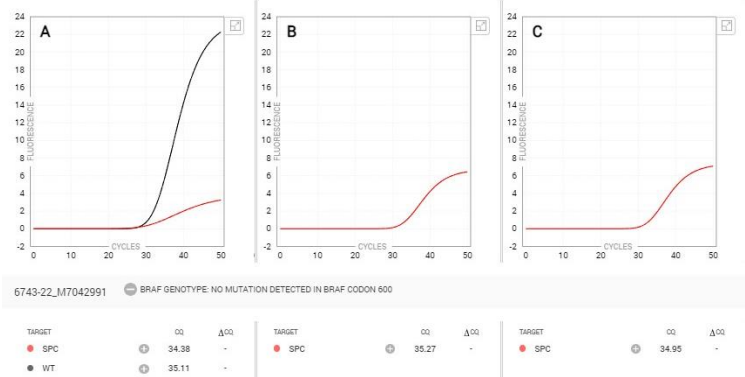

Figure S6. *BRAF* Lys601Glu  
 NGS result: *BRAF* c.1801A>G, p.K601E (VAF: 19%)  
 Idylla software interpretation: NO MUTATION DETECTED IN *BRAF* CODON 600

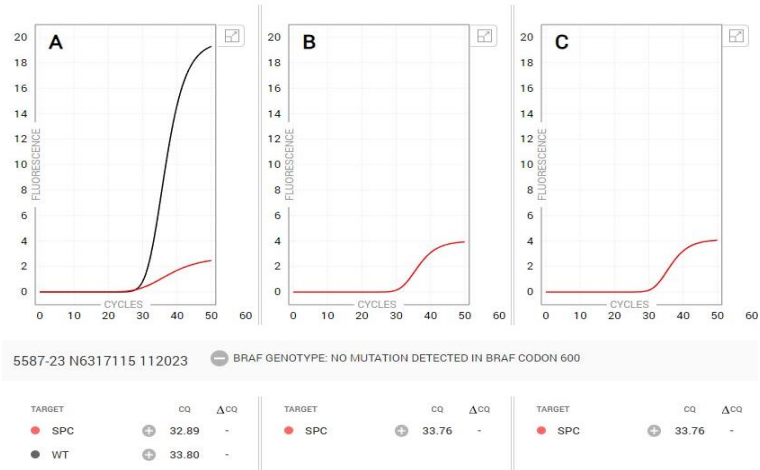

Figure S7. *BRAF* Lys601Thr  
 NGS result: *BRAF* c.1802A>C, p.K601T (VAF: 18%)  
 Idylla software interpretation: NO MUTATION DETECTED IN *BRAF* CODON 600

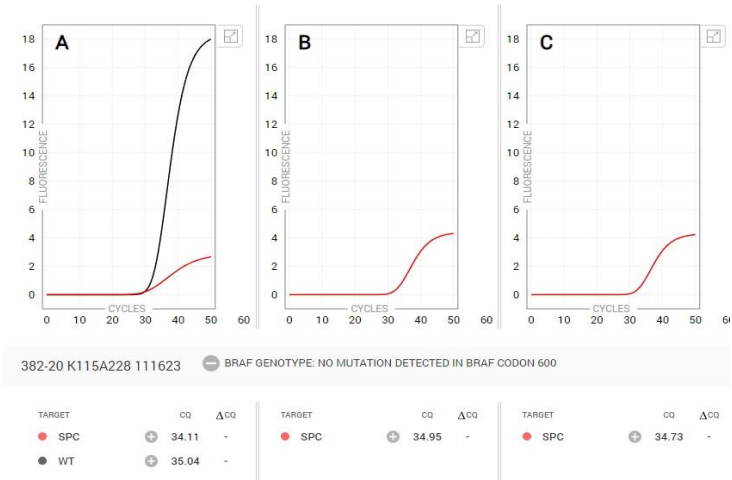

Figure S8. *BRAF* Lys601Asn  
 NGS result: *BRAF* c.1803A>C, p.K601N (VAF: 41%)  
 Idylla software interpretation: NO MUTATION DETECTED IN *BRAF* CODON 600

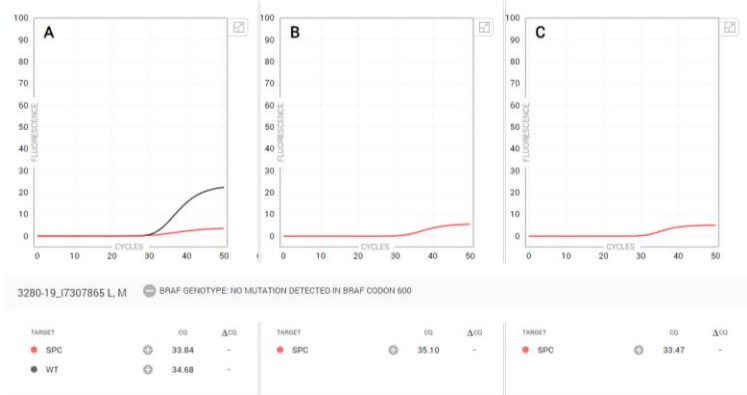

Figure S9. *BRAF* Trp604Cys

NGS result: *BRAF* c.1812G>C, p.W604C (VAF: 47%)

*BRAF* c.1780G>A, p.D594N (VAF: 47%),

*KRAS* c.34\_35delGGinsTT, p.G12F (VAF: 49%)

Idylla result: NO MUTATION DETECTED IN *BRAF* CODON 600

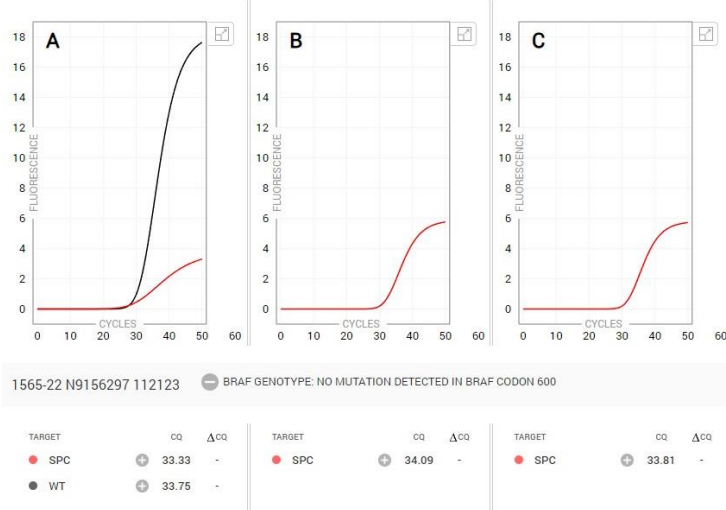

Supplement: s1 [file s1]
